# Supplementary material for: Comparison between five acellular oxidative potential measurement assays performed with detailed chemistry on PM 10 samples from the city of Chamonix (France)
Source: Copernicus journal article supplement (doi:10.5194/acp-2017-1062), 2017-12-11
Supplement: Supplementary file [file acp-2017-1062-AC1-supplement.pdf]

# Comparison between five acellular oxidative potential measurement assays performed with detailed chemistry on PM<sub>10</sub> samples from the city of Chamonix (France)

5 Aude Calas<sup>1</sup>, Gaëlle Uzu<sup>1</sup>, Frank J. Kelly<sup>2</sup>, Stephan Houdier<sup>1</sup>, Jean M.F Martins<sup>1</sup>, Fabrice Thomas<sup>3</sup>, Florian Molton<sup>3</sup>, Aurélie Charron<sup>1, 4</sup>, Christina Dunster<sup>2</sup>, Ana Oliete<sup>2</sup>, Véronique Jacob<sup>1</sup>, Jean-Luc Besombes<sup>5</sup>, Florie Chevrier<sup>1, 5</sup>, and Jean-Luc Jaffrezo<sup>1</sup>

<sup>1</sup>Univ. Grenoble Alpes, CNRS, IRD, Grenoble INP\*, IGE, F-38000 Grenoble, France

<sup>2</sup>Kings College London, MRC PHE Ctr Environm Hlth, London, England.

<sup>3</sup>Univ. Grenoble Alpes, DCM, F-38 000 Grenoble, France

10 <sup>4</sup>IFSTTAR, F-69675 Bron, France.

<sup>5</sup>Univ. Savoie Mont Blanc, LCME, 73000 Chambéry, France

*Correspondence to:* Gaëlle Uzu ([gaelle.uzu@ird.fr](mailto:gaelle.uzu@ird.fr))

**Abstract.** Many studies have demonstrated associations between exposure to ambient particulate matter (PM) and adverse health outcomes in humans that can be explained by PM capacity to induce oxidative stress in vivo. Thus, assays have been developed to quantify the oxidative potential (OP) of PM as a more refined exposure metric than PM mass alone. Only a small number of studies have compared different acellular OP measurements for a given set of ambient PM samples. Yet, fewer studies have compared different assays over a year long period and with detailed chemical characterization of ambient PM. In this study, we report on seasonal variations of the dithiothreitol (DTT), ascorbic acid (AA), electron spin resonance (ESR) and the respiratory tract lining fluid (RTLFL, composed of the reduced glutathione (GSH) and ascorbic acid (ASC)) assays over a one year period in which 100 samples were analysed. A detailed PM<sub>10</sub> characterization allowed univariate and multivariate regression analyses in order to obtain further insight into groups of chemical species that drive OP measurements. Our results show that most of the OP assays were strongly inter-correlated over the sampling year but also these correlations differed when considering specific sampling periods (cold vs warm). All acellular assays are correlated with a significant number of chemical species when considering univariate correlations, especially for the DTT assay. Evidence is also presented of a seasonal contrast over the sampling period with significantly higher OP values during winter for the DTT, AA, GSH and ASC assays, which were assigned to biomass burning species by the multiple linear regression models. The ESR assay clearly differs from the other tests as it did not show seasonal dynamics and presented weaker correlations with other assays and chemical species.

## 1 Introduction

Many studies have demonstrated associations between exposure to ambient particulate matter (PM) and adverse health outcomes in humans. A central mechanism to explain the harmful effects of a range of inhaled particles at the cellular level involves the production of oxidative stress through the generation of excessive reactive oxygen species (ROS) and/or inadequate antioxidant defenses (Borm et al., 2007; Kelly, 2003). The capacity of PM to elicit damaging oxidative reactions is termed oxidative potential (OP).

On this basis, probes have been developed over the last decade to quantify the OP of PM as a more refined exposure metric of PM toxicity than PM mass alone (Ayres et al., 2008; Borm et al., 2007). These probes include several acellular assays. The most common consisting in mimicking the consumption of antioxidants (*e.g.* ascorbic acid (AA), reduced glutathione (GSH)) or surrogates (*e.g.* dithiothreitol (DTT)), the use of the synthetic human respiratory tract lining fluid (RTLFL) system (again to assess antioxidant depletion), probes measuring HO<sup>•</sup> production or the application of electron spin resonance (ESR) to quantify the ability of PM to induce specific ROS (*e.g.* HO<sup>•</sup> radicals). Oxidative potential can be considered as an integrative metric of PM characteristics (size, composition, surface area...) potentially linked to the particles toxicity through oxidative stress. Therefore, they could help to delineate those particle properties (components and sources) responsible for observed health effects. However, each of these assays is sensitive to different panels of ROS generating compounds, and results are also sensitive to the assay design. Indeed a consensus has yet to emerge regarding a standard in vitro test system or combination of tests that would be most appropriate for PM-related health impact evaluation (Ayres et al., 2008).

Only a small number of studies have compared different acellular OP measurements for a given set of ambient PM samples (Fang et al., 2016; Janssen et al., 2014; Künzli et al., 2006; Szigeti et al., 2015; Visentin et al., 2016; Yang et al., 2014). Yet, fewer studies have compared different assays over a year long period to gain a better understanding of seasonal variability (Fang et al., 2016; Jedynska et al., 2017; Saffari et al., 2014; Szigeti et al., 2015; Yang et al., 2015). Finally, there is little research relating the oxidative capacity of particulate pollution with detailed chemical characterization of ambient PM, in an attempt to identify the PM components or sources that may contribute most to underlying toxicity (Fang et al., 2016; Kelly et al., 2011; Saffari et al., 2014; Verma et al., 2014; Weber et al., 2018).

In this study, a series of 100 PM<sub>10</sub> samples collected over a one year period were screened for ROS burden using 4 acellular measures of OP: DTT, AA, ESR and RTLFL assays. The RTLFL assay includes 3 antioxidants: reduced glutathione (GSH), ascorbic acid (referred as ASC) and urate (UA). Two ascorbic acid depletion assays (AA and ASC), using different quantification techniques, were therefore included in our analyses. DTT is known to react with organic compounds but also with transition metals (Charrier and Anastasio, 2012; Lin and Yu, 2011). The ESR assay employs the spin trap 5,5-Dimethyl-1-pyrroline N-oxide (DMPO) and is specific for reactive radical species, which for example result from partial reduction of dioxygen catalyzed by transition metal (Boogaard et al., 2012; Shi et al., 2003). The AA assays would be more specific to the oxidative potential of transition metals (Godri et al., 2011; Yang et al., 2014), but ascorbic acid is known to react with organics such as quinones (Shang et al., 2012; Visentin et al., 2016). All of these assays have shown some

correlations with health outcomes in epidemiological studies (Abrams et al., 2017; Bates et al., 2015; Fang et al., 2016; Strak et al., 2017; Weichenthal et al., 2016a, 2016b; Yang et al., 2016). Detailed PM<sub>10</sub> characterization was performed in parallel, by analyzing up to 130 chemical species that incorporated a broad array of organic species and trace elements (Chevrier, 2016).

- 5 In this paper, we report on seasonal variations within the redox activity assays as well as on the correlation among the different assays over a one year period. Univariate and multivariate regression analyses were applied in order to obtain (a) further insight into groups of chemical species that drive OP measurements and (b) evaluate if differences could be detected between the individual assays.

## 2 Material and methods

### 10 2.1 Site description and sampling

In Europe, particulate matter sanitary alert are based on PM<sub>10</sub> measurements. PM<sub>10</sub> were collected in the downtown area of Chamonix (45°55'21.53" N, 6°52'11.68" E, Auvergne-Rhône Alpes, France, 1035 masl) in the Alpine Arve valley. This urban location is heavily impacted in winter by biomass burning (wood combustion used for domestic heating) and traffic emissions. Further, because of their topography, specific weather conditions and anthropogenic activities, the European daily limit value for PM<sub>10</sub> is often exceeded in many sites in the Alpine valleys during the winter period (Chevrier, 2016), including this site in Chamonix.

In the framework of the DECOMBIO project (biomass burning contribution to PM<sub>10</sub> in the Arve's Valley) PM<sub>10</sub> sampling and detailed chemical characterizations have been achieved, and are described elsewhere (Chevrier, 2016). Briefly, ambient particles were collected by filtration during 24 h ( $24 \times 30 \text{ m}^3 \cdot \text{h}^{-1}$ ) with a DIGITEL DA-80 on 150 mm quartz filters (Tissuquartz Pallflex) using the European standard protocol NF EN 16450. The filters were calcined at 500 °C for 8 h before use. After sampling, the filters were folded, wrapped in aluminum foils, sealed in polyethylene bags and stored at -25 °C until chemical analyses and at 4 °C until OP analysis. PM<sub>10</sub> mass measurements were achieved at the sampling site with TEOM-FDMS, as part of the regular Atmo-AURA network of Air Quality observation (<http://www.air-rhonealpes.fr/>).

### 2.2 Chemical analyses

#### 25 2.2.1 PM<sub>10</sub> chemical composition

Briefly, collected PM<sub>10</sub> samples were measured for the following elements and components: elemental and organic carbon (EC, OC), BC and the distinction between wood burning (BC<sub>wb</sub>) and fossil fuel BC (BC<sub>ff</sub>), soluble anions and cations (NO<sub>3</sub><sup>-</sup>, SO<sub>4</sub><sup>2-</sup>, Cl<sup>-</sup>, MSA, oxalate and NH<sub>4</sub><sup>+</sup>, Mg<sup>2+</sup>, Na<sup>+</sup>, Ca<sup>2+</sup>, K<sup>+</sup>), a large range of inorganic elements (Al, Fe, Ti, As, Ba, Cd, Ce, Cr, Cu, La, Li, Mn, Mo, Ni, Pb, Rb, Sb, Sn, Sr, V, Zn and Zr), sugar alcohols (arabitol, sorbitol, and mannitol, also called  $\Sigma$  Polyols), monosaccharide anhydrides (levoglucosan, mannosan and galactosan,  $\Sigma$  Monosaccharides), humic like substances

(HULIS), and polar and apolar organics tracers (alkanes ( $\Sigma$  alkanes), hopanes ( $\Sigma$  hopanes), methoxyphenols ( $\Sigma$  methoxyphenols), polycyclic aromatic hydrocarbons ( $\Sigma$  PAHs), substituted derivatives (methyl-PAHs) and polycyclic aromatic sulfur heterocycles ( $\Sigma$  PASHs). More detailed information is available in the SI (Section 1).

## 2.2.2 Oxidative Potential assays

5 A total of 98 PM<sub>10</sub> samples collected, from November 2013 to October 2014, were analyzed for redox activity. Since studies have shown a non-linear DTT response to both PM concentrations (Charrier et al., 2016) or from different chemical species added to the assay (Calas et al., 2017; Wang et al., 2017), for the DTT and AA assays (single compound assay), extractions were achieved for each sample to a final concentration of 10  $\mu\text{g}\cdot\text{ml}^{-1}$  allowing samples inter-comparison as same extractions at constant-mass were used. For extraction procedure, PM samples were extracted in using a Gamble + DPPC solution and  
10 vortexed at maximum speed during 2h at 37°C (Calas et al., 2017). This solution allows for the extraction of PM in an environment closer to physiological conditions. Our previous results (Calas et al., 2017) also show an improvement of PM suspension during the assay thus facilitating the OP DTT measurement. In this study, non-linear response to PM concentrations was observed in the case of the DTT assay but not in the case of the AA assays (more details can be found in the SI Section 2 and Figure S1). Conversely, for RTLf and ESR assays, no extraction procedure was performed. Filter  
15 punches of 0.196 cm<sup>2</sup> were used in a “direct” measurement (cf. individual subsections for more information). PM OP measurements with the DTT, AA (single compound assay) and ESR assays were performed at the Grenoble Alpes University in early 2016. The RTLf assay was measured at the King’s College of London between late 2014 and 2015.

### 2.2.2.1 DTT assay

A semi-automated procedure was used with a plate-reader TECAN spectrophotometer Infinite® M 200 pro and 96 well  
20 CELLSTAR® multiwall plates from Greiner bio-one®, the assay was modified from the DTT assay of Cho et al. (2005). DTT depletion was monitored for 30 min by adopting the following procedure: (1) measurement of the matrix absorbance ( $\text{Abs}_{\text{mat}}$ ) of particles and substrate at 412 nm (205  $\mu\text{L}$  of phosphate buffer and 40  $\mu\text{L}$  of PM suspension); (2) injection of 12.5 nmol of DTT (50  $\mu\text{L}$  of 0.25 mM DTT solution in phosphate buffer); (3) for each sample (lab blank included) quantification of DTT immediately ( $t = 0$ ) and after 15 and 30 min of exposure (50  $\mu\text{L}$  of 1 mM 5,5'-dithiobis(2-nitrobenzoic acid)  
25 (DTNB) in phosphate buffer) in triplicate. Positive controls consisted in 1,4-naphthoquinone (1,4-NQ) solution and DTT depletion by 1,4-NQ (40  $\mu\text{L}$  of 24.7  $\mu\text{M}$  stock solution) were quantified only once at each measurement time because of the good repeatability between triplicates (Calas et al., 2017).

The rate of DTT loss ( $\text{nmol}\cdot\text{min}^{-1}$ ) was determined from the slope of the linear regression of calculated nmol of consumed DTT vs time. The amount of remaining DTT was calculated following Eq (1):

30 
$$n_{\text{DTT},i} = \frac{\text{Abs}_i * n_{\text{DTT},0}}{\text{Abs}_{t0}} \quad (1)$$

where  $n_{\text{DTT},i}$  is the amount of DTT (nmol) at  $t=i$ ,  $\text{Abs}_i$  is the absorbance at  $t=i$ ,  $n_{\text{DTT},0}$  is the initial amount of DTT (nmol) and  $\text{Abs}_0$  is the absorbance at  $t=0$ .

The linear regression was considered acceptable when  $R^2 > 0.90$  and when less than 70% of the initial amount of DTT had been oxidized (Li et al., 2009). Matrix absorbance (Gamble + DPPC solution and PM) was subtracted from the final absorbance and DTT loss in the lab blanks was subtracted from DTT loss of the samples in order to obtain the actual DTT depletion of the samples. Normalization per cubic meter, representative of human exposure, was chosen and OP DTTv (nmol DTT.min<sup>-1</sup>.m<sup>-3</sup>) was calculated by multiplying DTT depletion per  $\mu\text{g}$  of PM added in the wells by  $\text{PM}_{10}$  mass concentration ( $\mu\text{g.m}^{-3}$ ). The measurement quality was estimated by calculating the coefficient of variation (CV %) of positive controls (1,4-NQ). The CV was below 2% ( $n=13$ ). For the DTT assay, a total of 98 samples were analyzed. Field blanks (6 samples distributed over the sampling year) were also analyzed and observed contamination remained constant over the year (more details can be found in the SI Section 2 and Figure S2).

### 2.2.2.2 AA assay (single compound assay)

As for the DTT assay, a semi-automated procedure using the same plate reader was applied using Greiner UV-Star® 96 well plates, this assay was based on the modified assay from Zielinski et al. (1999) and Mudway et al. (2004). Matrix absorbance ( $\text{Abs}_{\text{mat}}$ ) measurement of PM and substrate at 265 nm was performed (120  $\mu\text{L}$  of Milli-Q water and 80  $\mu\text{L}$  of PM suspension). Then, 24 nmol of AA (100  $\mu\text{L}$  of 0.24 mM AA solution in Milli-Q water) were injected and absorbance was read at 2min and then every 4 min for 30 min. Positive controls (80  $\mu\text{L}$  of 24.7  $\mu\text{M}$  1,4-NQ solution) were quantified in duplicates. The rate of AA loss (nmol.min<sup>-1</sup>) was determined from the slope of the linear regression of calculated nmol of consumed AA vs time. The amount of remaining AA was calculated in the same way as for DTT (Equation 1). The linear regression was considered acceptable when  $R^2 > 0.90$ . The matrix absorbance was subtracted from the final absorbance and the AA loss in the lab blanks (blank filter) was subtracted from the AA loss of the samples in order to obtain the actual AA depletion of the samples. AA<sub>v</sub> (nmol AA. min<sup>-1</sup>. m<sup>-3</sup>) were calculated in the same way as for DTT. The measurement quality was estimated calculating the coefficient of variation (CV %) of the positive control (1,4-NQ). The CV was below 2% ( $n=7$ ). For the AA single compound assay a total of 98 samples were analyzed. Field blanks were also analyzed and no differences with lab blanks were observed (SI Section 2 and Figure S3).

### 2.2.2.3 ESR assay

A modified ESR assay involving no filter extraction was used (Hellack et al., 2014). This alternative method is highly correlated with that involving filter extraction (Hellack et al., 2014; Yang et al., 2014). This approach is based on the generation of HO<sup>•</sup> radicals in the presence of hydrogen peroxide, via Fenton-type reactions and their trapping by the nitron DMPO. Filter punches (0.196 cm<sup>2</sup>) were placed in 1 mL tubes, and 125  $\mu\text{L}$  Milli-Q water, 125  $\mu\text{L}$  H<sub>2</sub>O<sub>2</sub> (0.5 M) and 250  $\mu\text{L}$  of DMPO (0.05 M, ESR grade) were added. Tubes were subsequently vortexed for 15 s before being placed in incubation at

37° C for 40 min under agitation (detailed information in SI Section 3, Figure S4). Suspensions were then vortexed again for 15s and 35 µL of the suspension were transferred to a capillary tube to measure the hydroxyl radical (HO<sup>•</sup>) formation catalyzed by PM<sub>10</sub>. The EPR spectra were recorded on a Bruker EMXplus spectrometer equipped with a high sensitivity resonator operating at 9.44 GHz at 293 K. Preliminary results have shown a strong decrease of ESR response when Gamble + DPPC solution was used instead of Milli-Q water, thus justifying the use of Milli-Q water in this study (SI Section 3 and Figure S5). Filter blanks and a suspension of CuO (2.73 M) were used for background correction and as a positive control respectively. The 26% (n=7) coefficient of variation of the positive control was attributed from changes in the dispersion of this insoluble form of Cu. Due to limited remaining samples, extractions could not be performed at identical concentrations for all samples. Corrections were applied to the ESR signal when non-linear pattern vs PM mass was observed (SI Section 3). For the ESR assay, a series of 75 samples only was analyzed due to sample availability. OP ESR was expressed in arbitrary units (A.U.) per cubic meter and will be further referred to as OP ESRv.

#### 2.2.2.4 RTLF assay

For the RTLF assay, 0.5 mL of synthetic RTLF containing equimolar concentrations (200µM) of ascorbic acid (ASC), urate (UA) and reduced glutathione (GSH) were added to triplicate tubes containing 0.196 cm<sup>2</sup> filter punch and incubated for 4 hours at 37°C under constant mixing and as preliminary results indicated linear RTLF response to PM concentrations added to the assay (internal report). The synthetic RTLF was prepared in chelex 100 treated HPLC grade water (pH 7). Particle-free controls at 0 and 4 h (C0 and C4), together with negative (carbon black M120) and positive (CRM NIST1648a) controls, and lab filter blanks were incubated in parallel (Mudway et al., 2004). After 4 h incubation, the micro-tubes were immediately centrifuged at 13 000 rpm for 1 h at 4°C, followed by removal of aliquots into 100 mM phosphate buffer pH 7.5 (for GSH analysis) or 5% *meta*-phosphoric acid (for ASC and UA analysis). All tubes were immediately stored at -70°C. GSH analysis was derived from the total glutathione and oxidized glutathione (GSSG) analysis using a spectrophotometric enzyme-linked DTNB recycling method based on a modified method described by Baker et al. (1990). The ASC and UA analysis used a reversed-phase high performance liquid chromatography HPLC system (HPLC, Gilson Scientific UK) with electrochemical detection (EG&G, Princeton applied research, model 400) following the procedure described by Iriyama et al. (1984). Field blanks were used for background correction before estimating the consumption of antioxidants. The consumption rate (% OP) of the antioxidants ASC (% OP ASC), UA (% OP UA) and GSH (% OP GSH) were obtained by reference to the 4 h particle-free control (C4). Conversion from % OP to OP per µg of PM and then to OP per cubic meter were also calculated and will be referred to as OP GSHv and OP ASCv. Results for UA are not presented, since PM did not deplete urate (Mudway et al., 2004; Zielinski et al., 1999). The lab blanks and carbon black negative control displayed minimal (< 5%) background oxidation. The positive PM control (CRM NIST 1648a) reacted with up to 35 % consumption of the ASC. The same 98 PM<sub>10</sub> samples as those used in the AA (single compound assay) and the DTT assays were analyzed.

### 3 Data analyses

All statistical analyses were carried out using the R statistical software 3.4.0. Non-parametric Mann-Whitney tests were used in order to evaluate the statistical significance between the cold and the warm periods. Nonparametric Spearman's rank correlations ( $r_s$ ) were chosen to assess the strength of possible monotonic relationship between the different OP values and the concentration of the different pollutants measured. Linear model (lm) function in R was used for the multiple regressions. P values <0.05 were considered statistically significant.

### 4 Results and discussion

#### 4.1 PM<sub>10</sub> mass concentration and temperature in Chamonix

Figure 1A shows the mass concentration of PM<sub>10</sub> over the sampling period in Chamonix, taking into account the days with filters analyzed for OP (SI Table S1). Corresponding temperatures are illustrated in Figure 1 B. The data are clearly characterized by two periods, a cold period (late November to late February, n=30) and the warm period (late May to late September, n=29) with average temperatures of 1.4°C and 14.9°C, respectively. PM<sub>10</sub> concentrations were 2.6 times higher during the cold period (Table 1) ( $29 \pm 14 \mu\text{g}/\text{m}^3$  and  $10 \pm 2 \mu\text{g}/\text{m}^3$  for the cold and warm periods, respectively). The significant differences (Figure 1 C) in PM<sub>10</sub> concentration between these two periods can be explained by different PM<sub>10</sub> sources, and frequent temperature inversions in this narrow valley in winter. Investigation of the former using a positive matrix factorization (PMF) approach (Chevrier, 2016) indicates that during winter, the dominant emission source is biomass burning (60% of PM mass on average), with 10% due to traffic and about 18% related to secondary inorganic aerosols (SIA). In summer, the main sources are biogenic activity (40%), SIA (35%), and traffic (10%).

**Table 1 : Median ratios between cold (late November to late February) and warm (late May to late September) periods for PM<sub>10</sub> mass concentration and OP measurements expressed per m<sup>3</sup> (OPv) (\*\*\*) p < 0.001; non parametric Mann Whitney test, <sup>a</sup>1st and 3rd quartiles of the temporal ratio).**

|                                     | Cold / Warm period [1st , 3rd] <sup>a</sup> |
|-------------------------------------|---------------------------------------------|
| PM <sub>10</sub> mass concentration | 2.6*** [2.3, 3.7]                           |
| OP DTTv                             | 2.1*** [1.7, 2.9]                           |
| OP AAv                              | 7.1*** [6.0, 9.1]                           |
| OP ESRv                             | 0.8 [0.7, 1.4]                              |
| OP GSHv                             | 5.0*** [4.6, 5.8]                           |
| OP ASCv                             | 8.3*** [7.5, 8.7]                           |

5

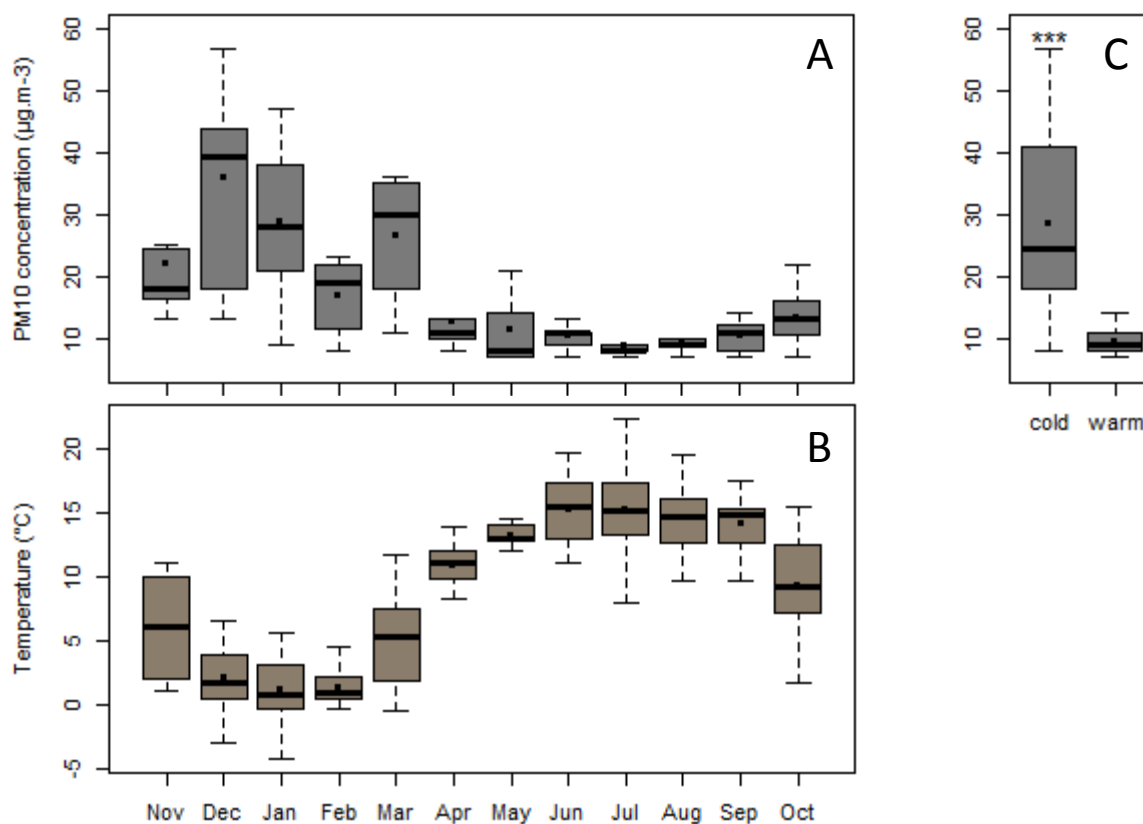

**Figure 1 : Temporal variation in (A) PM10 mass concentration and (B) temperature over the 12 month sampling period. (Average PM10 mass concentration during cold and warm periods (C)). Boxplot representations with medians (horizontal line) and means (black square). \*\*\* p < 0.001, nonparametric Mann-Whitney test.**

10



#### 4.2 OP temporal variation over the 12 month sampling period and during cold or warm periods

Methodological results on non-linear DTT response to PM concentrations are in agreement with Charrier et al. (2016) and were avoided thank to iso-mass concentration extraction. For the AA, ASC and GSH assays non-linear issues were not encountered. Finally, non-linear ESR response to PM concentrations was solved with backcorrection of ESR signal using  
5 linear curve. All together these methodological points allowed avoiding non-additive effects in OP assays and allowed PM samples inter-comparison.

The seasonal variation in OPv (OP measurements expressed per  $m^3$ ) is reported in Figure 2 (A, C, E, G, and I). Overall, higher and more variable OPv values were observed in the cold period than during the warm period where overall values remain low and close to each other. However, patterns did differ depending on the OP measurement method used.  
10 Significant differences between cold and warm periods were observed for the DTT, AA, GSH and ASC assays (Figure 2 B, D, F, H and J), but not for OP ESR (Figure 2 F). For the ESR assay, the yearly pattern could be attributed to a possible scavenging effect of HO $\cdot$  by carbonaceous materials (Hellack et al., 2015) leading to the observed non-seasonal variation. Table 1 presents the median ratios calculated between the two periods. OP ESRv values were equivalent in the 2 periods with a ratio of the medians of 0.8 (close to 1 and the interquartile range includes 1) while for the other assays, the ratio was  
15 always higher than 2. The OPv DTT was only two times higher during the cold period compared with the warm period, whilst higher contrasts of 5, 7.1 and 8.3 were found using the GSH, AA and ASC assays, respectively.

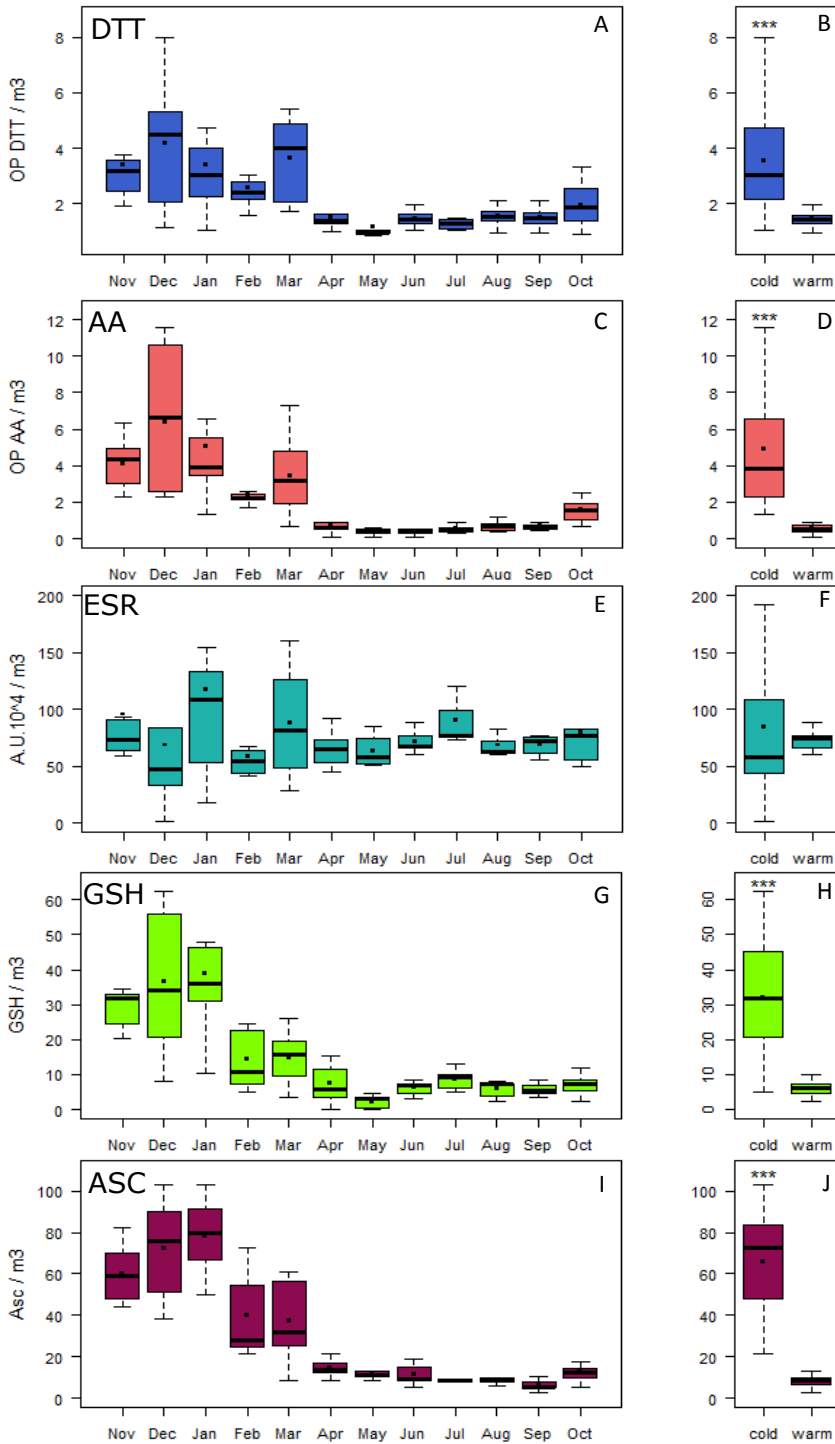

**Figure 2: Seasonal variation of the five OPv (A= OP DTT, C= OP AA, E= ESR, G= OP GSH, I= OP ASC) and OPv differences between cold and warm periods (B= OP DTT, D= OP AA, F= OP ESR, H= OP GSH, J= OP ASC). Boxplot representations with medians (horizontal line) and means (black square). \*\*\* p < 0.001; nonparametric Mann-Whitney test.**

### 4.3 Comparison of the OP measurement assays

Spearman correlations ( $r_s$ ) between the assays were calculated over the sampling year. Correlations were considered as strong for  $r_s > 0.70$  and moderate for  $r_s (> 0.45 \text{ and } < 0.70)$ . Table 2 shows that OPv values are all strongly correlated ( $r_s > 0.7$ ) with the exception of OP ESRv values for which correlations ranged from 0.16 (OP ASCv) to 0.45 (OP DTTv). All assays are also strongly correlated with PM<sub>10</sub> ( $r_s > 0.77$ ), except for OP ESRv ( $r_s = 0.33$ ). The strong correlations between OP DTTv and OP AAv are in agreement with another study on PM<sub>10</sub> (Janssen et al., 2014) whereas they were not observed by Fang et al. (2016) for PM<sub>2.5</sub>. The weak correlations found between the OP ESR assay and both OP DTT and OP GSH assays are also in agreement with other studies on PM<sub>2.5</sub> (Künzli et al., 2006; Yang et al., 2014). However, the OP ESR assay is usually highly correlated with OP AA and ASC assays in both PM<sub>10</sub> and PM<sub>2.5</sub> studies (Janssen et al., 2014; Künzli et al., 2006; Yang et al., 2014).

**Table 2: Spearman correlation of the five OPv measurement assays over the sampling year (\*\*\*)  $p < 0.001$  level, \*\*  $p < 0.01$  level, \*  $p < 0.05$  level).**

|                        | PM <sub>10</sub><br>n=98 | OP DTTv<br>n=98 | OP AAv<br>n=98 | OP ESRv<br>n=75 | OP GSHv<br>n=98 | OP ASCv<br>n=95 |
|------------------------|--------------------------|-----------------|----------------|-----------------|-----------------|-----------------|
| <b>PM<sub>10</sub></b> |                          |                 |                |                 |                 |                 |
| <b>OP DTTv</b>         | 0.88 ***                 |                 |                |                 |                 |                 |
| <b>OP AAv</b>          | 0.81 ***                 | 0.82 ***        |                |                 |                 |                 |
| <b>OP ESRv</b>         | 0.33 **                  | 0.45 ***        | 0.27 *         |                 |                 |                 |
| <b>OP GSHv</b>         | 0.77 ***                 | 0.73 ***        | 0.80 ***       | 0.26 *          |                 |                 |
| <b>OP ASCv</b>         | 0.80 ***                 | 0.72 ***        | 0.82 ***       | 0.16            | 0.80 ***        |                 |

As shown in Table 3, these correlations also vary with the period, with higher  $r_s$  values during cold period ( $0.54 < r_s < 0.92$ ) than in the warm period for which the highest correlation ( $r_s = 0.65$ ) was found between OP DTTv and OP AAv. Temporal variations of correlations were also observed by Fang et al. (2016) on PM<sub>2.5</sub>. During the cold period,  $r_s$  between OP methods and PM<sub>10</sub> ranged from moderate (0.59) for OP ESRv to strong ( $> 0.7$ ) for the other OP measurements. During the warm period, a strong correlation was observed between PM<sub>10</sub> and OP DTTv.

20

**Table 3 : Spearman correlation of the OPv in the cold (upper part, blue shaded) and the warm period (\*\*\* p < 0.001 level, \*\* p<0.01 level, \* p<0.05 level, <sup>a</sup>n=30 (cold period), n=29 (warm period), <sup>b</sup>n=30 (cold period), n=14 (warm period), <sup>c</sup>n=27 (cold period), n=29 (warm period)).**

|                  | PM <sub>10</sub> | OP DTTv <sup>a</sup> | OP AAv <sup>a</sup> | OP ESRv <sup>b</sup> | OP GSHv <sup>a</sup> | OP ASCv <sup>c</sup> |
|------------------|------------------|----------------------|---------------------|----------------------|----------------------|----------------------|
| PM <sub>10</sub> |                  | 0.92***              | 0.91***             | 0.59***              | 0.87***              | 0.90***              |
| OP DTTv          | 0.71***          |                      | 0.89***             | 0.61***              | 0.79***              | 0.72***              |
| OP AAv           | 0.43*            | 0.65***              |                     | 0.54***              | 0.85***              | 0.79***              |
| OP ESRv          | 0.088            | 0.17                 | 0.36                |                      | 0.56**               | 0.59**               |
| OP GSHv          | 0.44*            | 0.29                 | 0.36                | 0.63*                |                      | 0.92***              |
| OP ASCv          | 0.38*            | 0.37*                | -0.072              | -0.29                | 0.17                 |                      |

To better understand the evolution of OP results, OPv were related to the chemical composition of PM<sub>10</sub> by using both

5 univariate and multiple regressions analyses.

#### 4.4 Univariate data analyses

Spearman correlations between OPv and the chemical composition of PM<sub>10</sub> (expressed in ng/m<sup>3</sup> or µg/m<sup>3</sup>) were calculated over the sampling year and are summarized in Table 4. The highest cumulative score of correlations above 0.45 is seen for OP DTTv (37/48; detailed information on cumulative scores is available in the SI, section 4). Conversely, few correlations above 0.45 (5/48) are seen for OP ESRv. The other 4 assays (OP AAv, OP GSHv and OP ASCv) exhibit very similar correlations with the chemical species.

Whereas correlations are evident between OP DTTv, OP AAv, OP GSHv, OP ASCv and some organic and inorganic species, in agreement with other studies regarding both PM<sub>2.5</sub> and PM<sub>10</sub> (Janssen et al., 2014; Saffari et al., 2014; Yang et al., 2014), for OP ESRv correlations are limited to transition metals (Cr, Cu, Mo, Zr) and Ba. All these metals may be associated with traffic emissions, including brake wear (Hulskotte et al., 2014; Sanders et al., 2003). These results can be explained by the specificity of the ESR assay towards hydroxyl radical generation and in the case of Ba (not redox-active) linked to its co emission with the former redox active compounds. These results agree with the study of Boogaard et al. (2012) where the OP ESRv of PM collected near major urban road were highly correlated with Cr, Cu and Ba. However, OP ESRv is also associated to organic compounds (OC, PAH) in other studies (Janssen et al., 2014; Yang et al., 2014).

20 While many chemical species have a cumulative score of 4/5 over the sampling year, Cu is the only species with moderate to strong correlations with all OP measurements (N=5/5). Several studies, including one in a subway system (Moreno et al., 2017) already pointed out the high impact of Cu concentrations on OP.

**Table 4 : Spearman correlations between the OPv measurement assays and the chemical composition of PM10 (dark pink shaded : >0.7, light pink shaded : >0.45) (\*\*\*) p < 0.001 level, \*\* p<0.01 level, \* p<0.05 level, . p<0.10 level. N= cumulative score of correlations (moderate and strong)).**

|                               | DTT     | AA       | ESR     | GSH      | ASC      | N (5) |
|-------------------------------|---------|----------|---------|----------|----------|-------|
| Cl                            | 0.68*** | 0.73***  |         | 0.61***  | 0.77***  | 4     |
| NO <sub>3</sub> <sup>-</sup>  | 0.61*** | 0.59***  |         | 0.58***  | 0.74***  | 4     |
| SO <sub>4</sub> <sup>2-</sup> | 0.33*** |          | 0.27*   |          |          |       |
| Na <sup>+</sup>               | 0.47*** | 0.42***  |         | 0.34***  | 0.46***  | 2     |
| NH <sub>4</sub> <sup>+</sup>  | 0.38*** | 0.25*    |         | 0.32**   | 0.33***  |       |
| K <sup>+</sup>                | 0.83*** | 0.85***  | 0.34**  | 0.79***  | 0.77***  | 4     |
| Mg <sup>2+</sup>              | 0.56*** | 0.30**   | 0.43*** | 0.30**   | 0.28**   | 1     |
| Ca <sup>2+</sup>              | 0.53*** | 0.24*    | 0.32**  | 0.21*    | 0.32**   | 1     |
| Al                            |         |          | 0.24*   |          |          |       |
| As                            | 0.62*** | 0.44***  | 0.31**  | 0.43***  | 0.41***  | 1     |
| Ba                            | 0.68*** | 0.46***  | 0.57*** | 0.42***  | 0.35***  | 3     |
| Cd                            | 0.64*** | 0.65***  |         | 0.63***  | 0.72***  | 4     |
| Ce                            | 0.50*** | 0.30**   | 0.35**  | 0.33***  | 0.27**   | 1     |
| Cr                            | 0.55*** | 0.35***  | 0.54*** | 0.34***  |          | 2     |
| Cu                            | 0.87*** | 0.76***  | 0.48*** | 0.70***  | 0.64***  | 5     |
| Fe                            | 0.71*** | 0.48***  | 0.44*** | 0.43***  | 0.38***  | 2     |
| La                            | 0.44*** | 0.23*    | 0.37**  | 0.29**   | 0.27**   |       |
| Li                            | 0.22*   |          |         |          |          |       |
| Mn                            | 0.53*** | 0.22*    | 0.41*** | 0.22*    | 0.21*    | 1     |
| Mo                            | 0.65*** | 0.38***  | 0.46*** | 0.40***  | 0.27**   | 2     |
| Ni                            | 0.44*** |          | 0.37**  |          |          |       |
| Pb                            | 0.61*** | 0.42***  | 0.30**  | 0.43***  | 0.37***  | 1     |
| Rb                            | 0.84*** | 0.76***  | 0.33**  | 0.70***  | 0.71***  | 4     |
| Sb                            | 0.79*** | 0.66***  | 0.43*** | 0.59***  | 0.52***  | 4     |
| Sn                            | 0.70*** | 0.70***  | 0.29*   | 0.69***  | 0.83***  | 4     |
| Sr                            | 0.55*** | 0.29**   | 0.44*** | 0.27**   | 0.28**   | 1     |
| Ti                            | 0.36*** |          | 0.40*** |          |          |       |
| V                             |         | -0.28**  | 0.35**  | -0.25*   | -0.31**  |       |
| Zn                            | 0.84*** | 0.66***  | 0.40*** | 0.65***  | 0.64***  | 4     |
| Zr                            | 0.70*** | 0.50***  | 0.50*** | 0.48***  | 0.33***  | 4     |
| BC                            | 0.82*** | 0.90***  | 0.31*   | 0.75***  | 0.78***  | 4     |
| BC <sub>wb</sub>              | 0.77*** | 0.93***  | 0.27*   | 0.74***  | 0.87***  | 4     |
| BC <sub>fr</sub>              | 0.79*** | 0.84***  | 0.33**  | 0.70***  | 0.70***  | 4     |
| OC                            | 0.83*** | 0.87***  | 0.26*   | 0.81***  | 0.86***  | 4     |
| DOC                           | 0.79*** | 0.87***  | 0.29*   | 0.86***  | 0.87***  | 4     |
| HULIS                         | 0.85*** | 0.87***  | 0.26*   | 0.81***  | 0.86***  | 4     |
| EC                            | 0.82*** | 0.93***  | 0.25*   | 0.79***  | 0.84***  | 4     |
| TC                            | 0.84*** | 0.91***  | 0.26*   | 0.82***  | 0.87***  | 4     |
| MSA                           | -0.26** | -0.53*** |         | -0.36*** | -0.34*** |       |
| Oxalate                       |         |          |         |          |          |       |
| ∑ polyols                     |         | -0.33*** | 0.38*** | -0.27**  | -0.51*** |       |
| ∑ monosaccharides             | 0.74*** | 0.94***  |         | 0.78***  | 0.87***  | 4     |
| ∑ PAHs                        | 0.77*** | 0.92***  |         | 0.78***  | 0.88***  | 4     |
| ∑ alkanes                     | 0.63*** | 0.61***  |         | 0.54***  | 0.77***  | 4     |
| ∑ methyl-PAHs                 | 0.67*** | 0.85***  |         | 0.72***  | 0.87***  | 4     |
| ∑ PASHs                       | 0.60*** | 0.76***  |         | 0.71***  | 0.76***  | 4     |
| ∑ hopanes                     | 0.66*** | 0.67***  |         | 0.58***  | 0.79***  | 4     |
| ∑ methoxyphenols              | 0.72*** | 0.93**   |         | 0.77***  | 0.82***  | 4     |
| N (/48)                       | 37      | 27       | 5       | 25       | 25       |       |

#### 4.5 Multiple linear regression models

Multiple linear regressions were investigated in order to obtain further insight into the set of chemical species that can be among the dominant factors to the different OP measurements and for OP variations within time.

Such analysis requires the removal of extreme values, and also require transformations of the OP data in order to obtain 5 distributions as close as possible to the Normal one (detailed information about data set preparation can be found in the supporting information Section 5 and Table S2). The multiple linear regression models were obtained using linear model (lm) function in R software. Forward variable selection and BIC number criteria were used to select the predictors that give the better explanation of the variance of the OPv (SI Section 5 model realizations and validations). The models obtained, for the set of samples excluding the extreme values, are presented in the following Eq (2, 3, 4, 5, and 6):

10

$$\begin{aligned} \log(\text{OP DTTv}) = & -0.440 + 0.101 \times \text{Cu} + 0.0259 \times \sum\text{PAH} - 0.0247 \times \text{Mg}^{2+} \\ & + 0.273 \times \text{As} + 0.318 \times \text{Mo} + 0.00512 \times \text{MSA} + 0.002 \\ & \times \sum\text{Polyols} + 0.00135 \times \text{Na}^+ \end{aligned} \quad R^2=0.81 \quad (2)$$

$$\begin{aligned} \log(\text{OP AA v}) = & 0.433 + 0.000387 \times \sum\text{Monosaccharides} + 0.756 \times \text{Ni} - 0.372 \\ & \times \text{Mo} + 0.000538 \times \text{Fe} \end{aligned} \quad R^2=0.93 \quad (3)$$

$$\begin{aligned} \log(\text{OP AA v}) = & -1.43 + 0.00163 \times \sum\text{Monosaccharides} - 0.00171 \times \text{Ca}^{2+} \\ & + 1.69 \times \text{Sb} + 0.117 \times \text{Cu} + 0.00208 \times \text{Na}^+ + 0.00119 \times \text{Fe} \\ & + 0.0435 \times \text{Zn} \end{aligned} \quad R^2=0.87 \quad (4)$$

$$\begin{aligned} \text{OP ESRv} = & 339953 + 73037 \times \text{Cu} - 6725 \times \sum\text{Alkanes} - 441351 \times \text{Cd} \\ & + 20795 \times \text{Ti} \end{aligned} \quad R^2=0.62 \quad (5)$$

$$\begin{aligned} \sqrt{\text{OPGSHv}} = & 1.21 + 0.00161 \times \sum\text{Monosaccharides} + 0.210 \times \text{Cu} - 0.0642 \\ & \times \text{Mg}^{2+} + 0.0268 \times \text{MSA} \end{aligned} \quad R^2=0.48 \quad (6)$$

$$\begin{aligned} \log(\text{OP ASCv}) = & 1.79 + 0.000659 \times \text{NO}_3^- - 0.000901 \times \text{NH}_4^+ - 0.000843 \times \text{Fe} \\ & + 0.000247 \times \text{OC}^* + 0.103 \times \text{Cu} \end{aligned} \quad R^2=0.73 \quad (7)$$

Two distinct models were associated for the AA single compound assay since the distribution is highly bi-modal with two normal distributions, one in a cold period and one in a warmer period (SI Section 5 data set preparation). Strong coefficients of determination were found for the OP DTTv, AAv and ASCv ( $R^2 \text{ adj} > 0.70$ ) indicating that the variance of these OPv was well explained. For the ESRv and GSHv,  $R^2$  were lower, 0.62 and 0.48 respectively (SI Table S4).

5 Next, these models have then been applied to the general data set (Figure S6), but when strongly overestimated, values were removed again (SI Section 5 application to the overall data set). The models tend to underestimate OP values (negative intercept and slope = 0.84) for the ASC assay. For the other assays, the models tend to overestimate high OP values and to underestimate low OP values (negative intercept and slope between 1.11 and 1.51). However, the coefficients of determination range from 0.73 (OP ASCv) to 0.89 (OP AAv). **Altogether, these results indicate that on average, the models**  
10 **correctly represent the OP of PM participating to the ROS exposure during the overall year.**

Finally, the contribution of each predictor during cold and warm periods has been investigated (Figure 3) (SI Section 5 contribution of each predictor). **The intercepts, attributed to unknown species, were significantly  $> 0$  in all models. Moreover, for some species, a negative contribution was found (Table S4) that can be explained by an antagonist effect of some atmospheric components on OP (Hellack et al., 2015; Samake et al., 2017; Wang et al., 2017) or because of the**  
15 **weighting assignation of species in the models.** During the cold period, traffic tracers or indicators (like Cu, Fe, Mo, Ti, or  $\sum$  PAHs) are important positive factors to explain all OP measurements. Also, and with the exception of the ESR assay, biomass burning tracers ( $\sum$  Monosaccharides, including levoglucosan) or indicators such as  $\sum$  PAHs or OC\* (corresponding to total OC minus the molecular species measured) both strongly related to biomass burning emission (Bonvalot et al., 2016; Chevrier, 2016), are prominent positive factors for all assays for this cold period. These results agree with the observations  
20 on the seasonal evolution of OPv, with much larger values in the cold period when biomass burning emissions are dominant. Additionally, literature results on DTT reactivity towards organic compounds indicate higher impact of biomass burning species when compared to other organic compounds (Verma et al., 2015). During the warm period, traffic tracers and especially copper are important positive factors in OP measurements. In addition, road dust and industrial tracers (Zn,  $\text{Ca}^{2+}$ ) for the AA assay, and primary biogenic indicators ( $\sum$ polyols, MSA) for the DTT and GSH assays seem prominent factors of  
25 these OP measurements.

**Several limitations can be attributed to this study. Most important, all of these results have been obtained for a specific location and cannot be generalized as chemical composition of  $\text{PM}_{10}$  strongly differs from one location to another.  $\text{PM}_{10}$  chemistry is different from  $\text{PM}_{2.5}$  and the associations reported here are only valid for  $\text{PM}_{10}$ . Also, the results of the ESR assay warrant caution due to our back correction of the ESR signal linked to the non-linear response of the assay. Finally,**  
30 **multiple model result for the GSH assay is to be considered with caution since normal distribution was not reached in the first step of the analysis. Finally, these analyses are only relevant for  $\text{PM}_{10}$  when some health studies are now taking  $\text{PM}_{2.5}$  into account. Additional studies addressing comparison of OP results associated with  $\text{PM}_{10}$  and  $\text{PM}_{2.5}$  are needed (Gali et al., 2017; Styszko et al., 2017).**

However, all results point out that biomass burning and vehicular emissions in winter are the main sources correlated with ROS generation. In summer, ROS burden is associated to vehicular emissions, biogenic emissions, road dust, and industrial sources. All these results also suggest to associate assays in order to take into account this wide range of OP determinants. To achieve this, the DTT and the AA assays, or the DTT and the RTLf assays, can be associated to get the best information, which is in agreement with other studies on acellular OP measurements (Janssen et al., 2014; Yang et al., 2014). However, a definitive proposition for the best association of assays will most probably come from a final benchmark against epidemiological study outcomes (Fang et al., 2016; Strak et al., 2017; Weichenthal et al., 2016a).



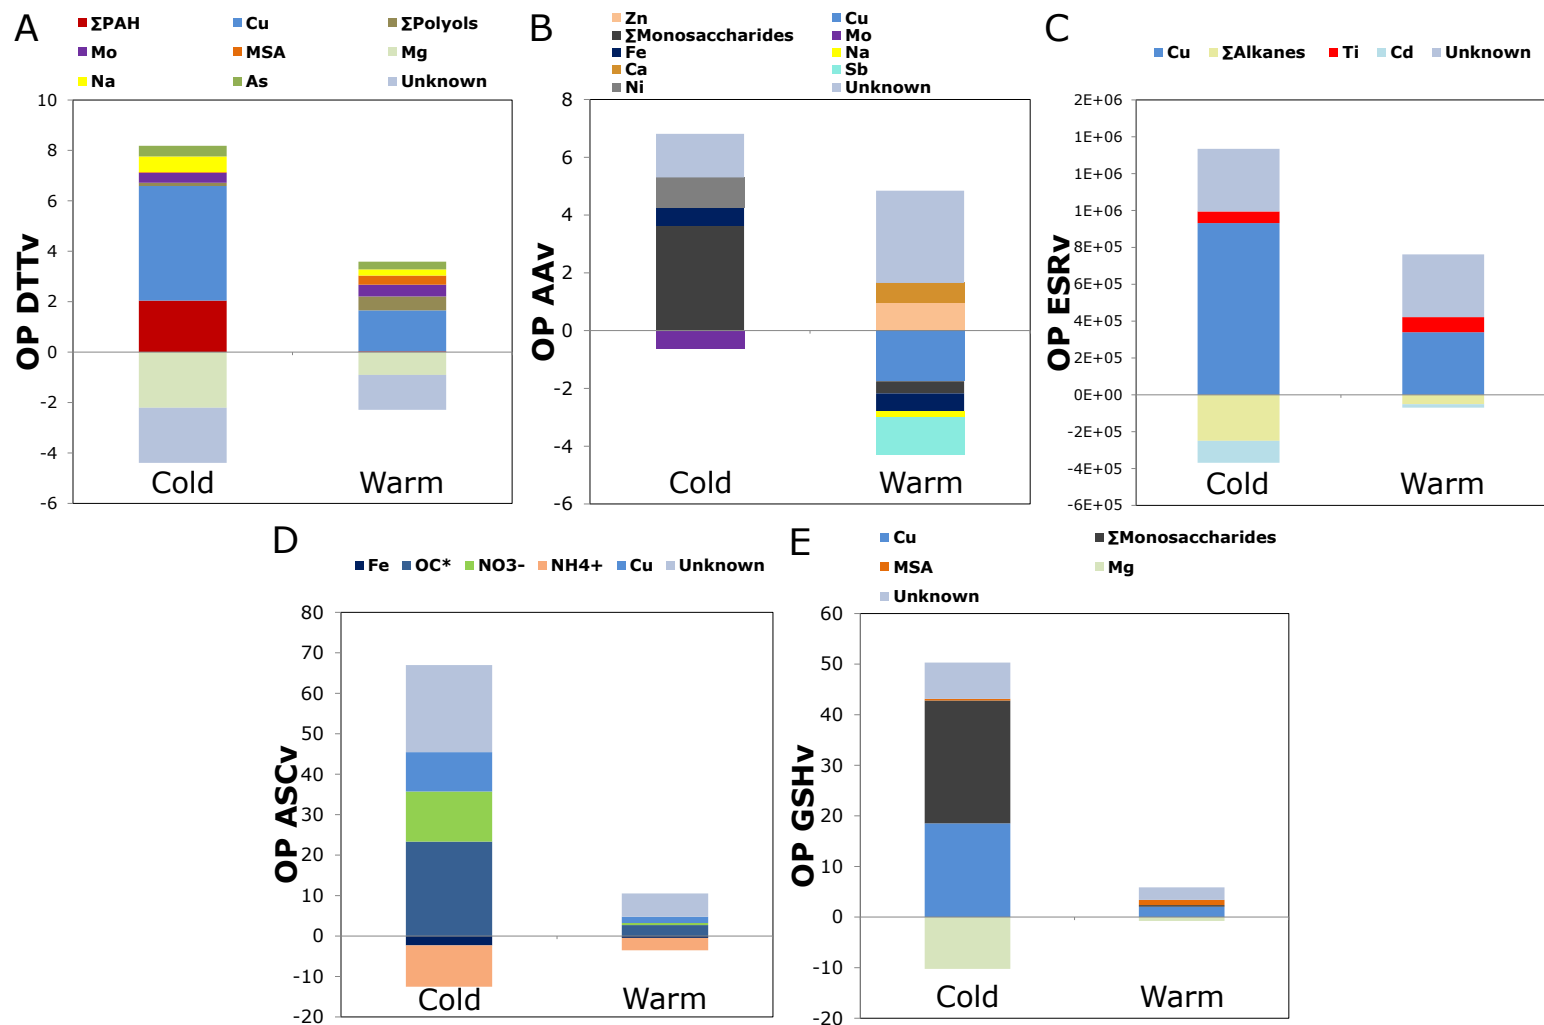

Figure 3: Multivariable linear regression analyses results: Contribution of predictors during cold and warm periods (A: OP DTTv, B: OP AAv, C: OP ESRv, D: OP GSHv, E: OP ASCv). The intercepts, attributed to unknown species, were significantly > 0 in all models. Some species were assigned with negative contributions, explained by a weighting assignment of species so as to model OP differences between warm and cold periods or a possible antagonist effect of some atmospheric components on OP contribution.

5

## 5 Conclusion

Our results show that most of the OP assays were strongly inter-correlated over the sampling year but also these correlations differed when considering specific sampling periods (cold vs warm).

All acellular assays are correlated with a significant number of chemical species when considering nonparametric rank correlations, especially for the DTT assay. Finally, copper seems to be a unifying determinant in the OP assays.

Evidence is also presented of a seasonal contrast over the sampling period with significantly higher OPv values during winter for the DTT, AA, GSH and ASC assays, which were assigned to biomass burning species by the multiple linear regression models. However, during the cold period and for the DTT assay,  $\Sigma$  PAHs, which can be associated to both traffic and biomass wood burning emissions, were found to be significant factors. The ESRv clearly differs from the other tests as it did not show seasonal dynamics and presented weaker correlations with other assays and with the chemical species. Nevertheless, ESR assay results are mostly associated with traffic tracer species. Finally, the combination of 2 models was used to fit the results of the AA assay which is necessary to provide the best explanation of OP variance, with a bi-modal distribution of the initial measurements. This indicates that the strong changes in the chemistry of the PM are probably leading to non-linear processes in the link between chemistry and OP.

Overall, these results suggest to combine assays in order to take into account a wide range of determinants of OP. In the case of the Chamonix city, DTT associated with AA assays or DTT combined with RTLf assay were able to provide the most exhaustive information about OP determinants (Cu) and sources associations (biomass burning, vehicular emissions).

Rank correlations and multiple linear regressions are useful tools to determine the most prominent species driving the redox activity of ambient PM. However, to go further in identifying the assay or combination leading to the best information relying on source dynamics, multiple linear regressions analysis that require large data sets. [Finally, more source apportionment approaches through positive matrix factorization methods are needed in order to assign dominant PM emission sources in the OP assays](#)

*Competing interests.* The authors declare no conflict of interest or competing financial interest

*Acknowledgements.* This work was funded in part by Primequal (DECOMBIO program in the Arve Valley, grant ADEME 1362C0028) and by ANSES (ExPOSURE program, grant 2016-CRD-31). The Région Auvergne Rhône-Alpes funded the PhD grant for F. Chevrier. The French research minister funded the PhD grant of A Calas with a Président Award. This study was also supported by direct funding by IGE (technician salary), the LEFE CHAT (program 863353: “Le PO comme

proxy de l'impact sanitaire”), and the LABEX OSUG@2020 (ANR-10-LABX-56) (both for funding analytical instruments). RENARD (Reseau National de Rpe interDisciplinaire) is kindly acknowledged for access to ESR analysis.

The authors would like to thank Thomas Lacroix, Jean-Charles Francony, Coralie Connès, Vincent Lucaire, and Fanny Masson for their dedicated work for the sample chemical and OP analyses, together with many people from Atmo AURA for collection of samples in the field, and G Brulfert (Atmo AuRA) for strong collaboration on the DECOMBIO Program. G Mocnik and I Jezek took part in the DECOMBIO program with all the measurement by AE33.

## References

- Abrams, J. Y., Weber, R. J., Klein, M., Samat, S. E., Chang, H. H., Strickland, M. J., Verma, V., Fang, T., Bates, J. T., Mulholland, J. A., Russell, A. G. and Tolbert, P. E.: Associations between ambient fine particulate oxidative potential and cardiorespiratory emergency department visits, *Environ. Health Perspect.*, 125(10), 1–9, doi:10.1289/EHP1545, 2017.
- 5 Ayres, J. G., Borm, P., Cassee, F. R., Castranova, V., Donaldson, K., Andy, G., Harrison, R. M., Hider, R., Frank, K., Kooter, I. M., Marano, F., Maynard, R. L., Mudway, I., Andre, N., Sioutas, C., Steve, S., Baeza-Squiban, A., Cho, A., Duggan, S. and Froines, J.: Evaluating the Toxicity of Airborne Particulate Matter and Nanoparticles by Measuring Oxidative Stress Potential — A Workshop Report and Consensus Statement, *Inhal. Toxicol.*, 20(August 2007), 75–99, doi:10.1080/08958370701665517, 2008.
- 10 Baker, A., Cerniglia, G. J. and Zaman, A.: Microtiter Plate Assay for the Measurement of Glutathione and Glutathione Disulfide in Large Numbers of Biological Samples, *Anal. Biochem.*, 190, 360–365, 1990.
- Bates, J. T., Weber, R. J., Abrams, J., Verma, V., Fang, T., Klein, M., Strickland, M. J., Sarnat, S. E., Chang, H. H., Mulholland, J. A., Tolbert, P. E. and Russell, A. G.: Reactive Oxygen Species Generation Linked to Sources of Atmospheric Particulate Matter and Cardiorespiratory Effects, *Environ. Sci. Technol.*, 49(22), 13605–13612, doi:10.1021/acs.est.5b02967, 2015.
- 15 Bonvalot, L., Tuna, T., Fagault, Y., Jaffrezo, J., Jacob, V., Chevrier, F. and Bard, E.: Estimating contributions from biomass burning, fossil fuel combustion, and biogenic carbon to carbonaceous aerosols in the Valley of Chamonix: a dual approach based on radiocarbon and levoglucosan, *Atmos. Chem. Phys.*, (16), 13753–13772, doi:10.5194/acp-16-13753-2016, 2016.
- Boogaard, H., Janssen, N. A. H., Fischer, P. H., Kos, G. P. A., Weijers, E. P., Cassee, F. R., Van der Zee, S. C., de Hartog, J., Brunekreef, B. and Hoek, G.: Contrasts in Oxidative Potential and Other Particulate Matter Characteristics Collected Near Major Streets and Background Locations, *Environ. Health Perspect.*, 120(2), 185–191, 2012.
- 20 Borm, P. J. A., Kelly, F., Künzli, N., Schins, R. P. F. and Donaldson, K.: Oxidant generation by particulate matter: from biologically effective dose to a promising, novel metric, *Occup. Environ. Med.*, 64, 73–74, doi:10.1136/oem.2006.029090, 2007.
- 25 Calas, A., Uzu, G., Martins, J. M. F., Voisin, D., Spadini, L., Lacroix, T. and Jaffrezo, J.: The importance of simulated lung fluid ( SLF ) extractions for a more relevant evaluation of the oxidative potential of particulate matter, *Sci. Reports*, (August), 1–12, doi:10.1038/s41598-017-11979-3, 2017.
- Charrier, J. G. and Anastasio, C.: On dithiothreitol ( DTT ) as a measure of oxidative potential for ambient particles: evidence for the importance of soluble transition metals, *Atmos. Chem. Phys.*, 12, 9321–9333, doi:10.5194/acp-12-9321-2012, 2012.
- 30 Charrier, J. G., Mcfall, A. S., Vu, K. K., Baroi, J., Olea, C., Hasson, A. and Anastasio, C.: A bias in the “mass-normalized” DTT response - An effect of non-linear concentration-response curves for copper and manganese, *Atmos. Environ.*, 144, 325–334, doi:10.1016/j.atmosenv.2016.08.071, 2016.

- Chevrier, F.: Chauffage au bois et qualité de l'air en Vallée de l'Arve : définition d'un système de surveillance et impact d'une politique de rénovation du parc des appareils anciens., 2016.
- Cho, A. K., Sioutas, C., Miguel, A. H., Kumagai, Y., Schmitz, D. A., Singh, M., Eiguren-Fernandez, A. and Froines, J. R.: Redox activity of airborne particulate matter at different sites in the Los Angeles Basin, *Environ. Res.*, 99, 40–47, doi:10.1016/j.envres.2005.01.003, 2005.
- 5 Fang, T., Verma, V., Bates, J. T., Abrams, J., Klein, M., Strickland, M. J., Sarnat, S. E., Chang, H. H., Mulholland, J. A., Tolbert, P. E., Russell, A. G. and Weber, R. J.: Oxidative potential of ambient water-soluble PM<sub>2.5</sub> in the southeastern United States : contrasts in sources and health associations between ascorbic acid ( AA ) and dithiothreitol ( DTT ) assays, *Atmos. Chem. Phys.*, 16, 3865–3879, doi:10.5194/acp-16-3865-2016, 2016.
- 10 Gali, N. K., Jiang, S. Y., Yang, F., Sun, L. and Ning, Z.: Redox characteristics of size-segregated PM from different public transport microenvironments in Hong Kong, *Air Qual. Atmos. Heal.*, 10(7), 833–844, doi:10.1007/s11869-017-0473-0, 2017.
- Godri, K. J., Harrison, R. M., Evans, T., Baker, T., Dunster, C., Mudway, I. S. and Kelly, F. J.: Increased Oxidative Burden Associated with Traffic Component of Ambient Particulate Matter at Roadside and Urban Background Schools Sites in London, *PLoS One*, 6(7), 1–11, doi:10.1371/journal.pone.0021961, 2011.
- 15 Hellack, B., Yang, A., Cassee, F. R., Janssen, N. A. H., Schins, R. P. F. and Kuhlbusch, T. A. J.: Intrinsic hydroxyl radical generation measurements directly from sampled filters as a metric for the oxidative potential of ambient particulate matter, *J. Aerosol Sci.*, 72, 47–55, doi:10.1016/j.jaerosci.2014.02.003, 2014.
- Hellack, B., Quass, U., Nickel, C., Wick, G., Schins, R. P. F. and Kuhlbusch, T. A. J.: Oxidative potential of particulate matter at a German motorway, *Environ. Sci. Process. Impacts*, 1–9, doi:10.1039/C4EM00605D, 2015.
- 20 Hulskotte, J. H. J., Roskam, G. D. and Denier Van Der Gon, H. A. C.: Elemental composition of current automotive braking materials and derived air emission factors, *Atmos. Environ.*, 99, 436–445, doi:10.1016/j.atmosenv.2014.10.007, 2014.
- Iriyama, K., Yoshiura, M., Iwamoto, T. and Ozaki, Y.: Simultaneous Determination of Uric and Ascorbic Acids in Human Serum by Reversed-Phase Liquid Chromatography with Electrochemical Detection, *Anal. Chim. Acta.*, 141, 238–243, 1984.
- 25 Janssen, N. A. H., Yang, A., Strak, M., Steenhof, M., Hellack, B., Gerlofs-Nijland, M. E., Kuhlbusch, T., Kelly, F., Harrison, R., Brunekreef, B., Hoek, G. and Cassee, F.: Oxidative potential of particulate matter collected at sites with different source characteristics, *Sci. Total Environ.*, 472, 572–581, doi:10.1016/j.scitotenv.2013.11.099, 2014.
- Jedynska, A., Hoek, G., Wang, M., Yang, A., Eeftens, M., Cyrus, J., Keuken, M., Ampe, C., Beelen, R., Cesaroni, G., Forastiere, F., Cirach, M., De Hoogh, K., De Nazelle, A., Nystad, W., Akhlaghi, H. M., Declercq, C., Stempfelet, M., Eriksen, K. T., Dimakopoulou, K., Lanki, T., Meliefste, K., Nieuwenhuijsen, M., Yli-tuomi, T., Raaschou-nielsen, O., Janssen, N. A. H., Brunekreef, B. and Kooter, I. M.: Spatial variations and development of land use regression models of oxidative potential in ten European study areas, *Atmos. Environ.*, 150, 24–32, doi:10.1016/j.atmosenv.2016.11.029, 2017.
- 30 Kelly, F., Anderson, H. R., Armstrong, B., Atkinson, R., Barratt, B., Beevers, S., Derwent, D., Green, D., Mudway, I. and

- Wilkinson, P.: The impact of the congestion charging scheme on air quality in London: Part 2. Analysis of the Oxidative Potential of Particulate Matter, *Res. Rep. Health. Eff. Inst.*, 155, 73–144, 2011.
- Kelly, F. J.: OXIDATIVE STRESS : ITS ROLE IN AIR POLLUTION AND ADVERSE HEALTH EFFECTS, *Occup. Environ. Med.*, 60, 612–616, 2003.
- 5 Künzli, N., Mudway, I. S., Götschi, T., Shi, T., Kelly, F. J., Cook, S., Burney, P., Forsberg, B., Gauderman, J. W., Hazenkamp, M. E., Heinrich, J., Jarvis, D., Norbäck, D., Payo-losa, F., Poli, A., Sunyer, J. and Borm, P. J. A.: Comparison of Oxidative Properties, Light Absorbance, and Total and Elemental Mass Concentration of Ambient PM 2.5 Collected at 20 European Sites, *Environ. Health Perspect.*, 115(5), 684–690, doi:10.1289/ehp.8584, 2006.
- Li, Q., Wyatt, A. and Kamens, R. M.: Oxidant generation and toxicity enhancement of aged-diesel exhaust, *Atmos. Environ.*, 10 43(5), 1037–1042, doi:10.1016/j.atmosenv.2008.11.018, 2009.
- Lin, P. and Yu, J. Z.: Generation of Reactive Oxygen Species Mediated by Humic-like Substances in Atmospheric Aerosols, *Environ. Sci. Technol.*, 45, 10362–10368, 2011.
- Moreno, T., Kelly, F. J., Dunster, C., Oliete, A., Martins, V., Reche, C., Cruz Minguillón, M., Amato, F., Capdevila, M., Miguel, E. De and Querol, X.: Oxidative potential of subway PM2.5, *Atmos. Environ.*, 148, 230–238, 15 doi:10.1016/j.atmosenv.2016.10.045, 2017.
- Mudway, I. S., Stenfors, N., Duggan, S. T., Roxborough, H., Zielinski, H., Marklund, S. L., Blomberg, A., Frew, A. J., Sandström, T. and Kelly, F. J.: An in vitro and in vivo investigation of the effects of diesel exhaust on human airway lining fluid antioxidants, *Arch. Biochem. Biophys.*, 423(1), 200–212, doi:10.1016/j.abb.2003.12.018, 2004.
- Saffari, A., Daher, N., Shafer, M. M., Schauer, J. J. and Sioutas, C.: Seasonal and spatial variation in dithiothreitol ( DTT ) activity of quasi-ultrafine particles in the Los Angeles Basin and its association with chemical species, *J. Environ. Sci. Heal.*, 20 49, 441–451, doi:10.1080/10934529.2014.854677, 2014.
- Samake, A., Uzu, G., Martins, J. M. F., Calas, A., Vince, E., Parat, S. and Jaffrezo, J. L.: The unexpected role of bioaerosols in the Oxidative Potential of PM, *Sci. Reports*, (August), 1–10, doi:10.1038/s41598-017-11178-0, 2017.
- Sanders, P. G., Xu, N., Dalka, T. M. and Maricq, M. M.: Airborne Brake Wear Debris : Size Distributions , Composition , 25 and a Comparison of Dynamometer and Vehicle Tests, *Environ. Sci. Technol.*, 37(18), 4060–4069, doi:10.1021/es034145s, 2003.
- Shang, Y., Chen, C., Li, Y., Zhao, J. and Zhu, T.: Hydroxyl Radical Generation Mechanism During the Redox Cycling Process of 1,4-Naphthoquinone, *Environ. Sci. Technol.*, 46, 2935–2942, 2012.
- Shi, T., Schins, R. P. F., Knaapen, A. M., Kuhlbusch, T., Pitz, M., Heinrich, J. and Borm, P. J. A.: Hydroxyl radical 30 generation by electron paramagnetic resonance as a new method to monitor ambient particulate matter composition, *J. Environ. Monit.*, 5, 550–556, doi:10.1039/b303928p, 2003.
- Strak, M., Janssen, N., Beelen, R., Schmitz, O., Vaartjes, I., Karssenbergh, D., Van den Brink, C., Bots, M. L., Dijst, M., Brunekreef, B. and Hoek, G.: Long-term exposure to particulate matter, NO 2 and the oxidative potential of particulates and

- diabetes prevalence in a large national health survey, *Environ. Int.*, 108(2), 228–236, doi:10.1016/j.envint.2017.08.017, 2017.
- Styszko, K., Samek, L., Szramowiat, K., Korzeniewska, A., Kubisty, K., Rakoczy-Lelek, R., Kistler, M. and Giebl, A. K.: Oxidative potential of PM<sub>10</sub> and PM<sub>2.5</sub> collected at high air pollution site related to chemical composition: Krakow case study, *Air Qual. Atmos. Heal.*, 10(9), 1123–1137, doi:10.1007/s11869-017-0499-3, 2017.
- 5 Szigeti, T., Óvári, M., Dunster, C., Kelly, F. J., Lucarelli, F. and Zárny, G.: Science of the Total Environment Changes in chemical composition and oxidative potential of urban PM<sub>2.5</sub> between 2010 and 2013 in Hungary, *Sci. Total Environ.*, 518–519, 534–544, doi:10.1016/j.scitotenv.2015.03.025, 2015.
- Verma, V., Fang, T., Guo, H., King, L., Bates, J. T., Peltier, R. E., Edgerton, E., Russell, A. G. and Weber, R. J.: Reactive oxygen species associated with water-soluble PM<sub>2.5</sub> in the southeastern United States : spatiotemporal trends and source apportionment, *Atmos. Chem. Phys.*, 14, 12915–12930, doi:10.5194/acp-14-12915-2014, 2014.
- 10 Verma, V., Fang, T., Xu, L., Peltier, R. E., Russell, A. G., Ng, N. L. and Weber, R. J.: Organic Aerosols Associated with the Generation of Reactive Oxygen Species (ROS) by Water-Soluble PM<sub>2.5</sub>, *Environ. Sci. Technol.*, 49(7), 4646–4656, doi:10.1021/es505577w, 2015.
- 15 Visentin, M., Pagnoni, A., Sarti, E. and Pietrogrande, M. C.: Urban PM<sub>2.5</sub> oxidative potential : Importance of chemical species and comparison of two spectrophotometric cell-free assays, *Environ. Pollut.*, 219, 72–79, doi:10.1016/j.envpol.2016.09.047, 2016.
- Wang, S., Ye, J., Soong, R., Wu, B., Yu, L., Simpson, A. and Chan, A. W. H.: Relationship between Chemical Composition and Oxidative Potential of Secondary Organic Aerosol from Polycyclic Aromatic Hydrocarbons, *Atmos. Chem. Phys.*, 20 (November), 1–53, 2017.
- Weber, S., Uzu, G., Calas, A., Chevrier, F., Besombes, J., Charron, A., Salameh, D., Ježek, I., Močnik, G. and Jaffrezo, J.: An apportionment method for the Oxidative Potential to the atmospheric PM sources : application to a one-year study in Chamonix, France., , 2015(January), 1–19, 2018.
- Weichenthal, S., Crouse, D. L., Pinault, L., Godri-Pollitt, K., Lavigne, E., Evans, G., Van Donkelaar, A., Martin, R. V and 25 Burnett, R. T.: Oxidative burden of fine particulate air pollution and risk of cause-specific mortality in the Canadian Census Health and Environment Cohort (CanCHEC), *Environ. Res.*, 146, 92–99, doi:10.1016/j.envres.2015.12.013, 2016a.
- Weichenthal, S. A., Lavigne, E., Evans, G. J., Godri Pollitt, K. J. and Burnett, R. T.: Fine particulate matter and emergency room visits for respiratory illness: Effect modification by oxidative potential, *Am. J. Respir. Crit. Care Med.*, 194(5), 577–586, doi:10.1164/rccm.201512-2434OC, 2016b.
- 30 Yang, A., Jedynska, A., Hellack, B., Kooter, I., Hoek, G., Brunekreef, B., Kuhlbusch, T. A. J., Cassee, F. R. and Janssen, N. A. H.: Measurement of the oxidative potential of PM<sub>2.5</sub> and its constituents: The effect of extraction solvent and filter type, *Atmos. Environ.*, 83, 35–42, doi:10.1016/j.atmosenv.2013.10.049, 2014.
- Yang, A., Hellack, B., Leseman, D., Brunekreef, B., Kuhlbusch, T. A. J., Cassee, F. R., Hoek, G. and Janssen, N. A. H.:

Temporal and spatial variation of the metal-related oxidative potential of PM<sub>2.5</sub> and its relation to PM<sub>2.5</sub> mass and elemental composition, *Atmos. Environ.*, 102, 62–69, doi:10.1016/j.atmosenv.2014.11.053, 2015.

Yang, A., Janssen, N. A. H., Brunekreef, B., Cassee, F. R., Hoek, G. and Gehring, U.: Children's respiratory health and oxidative potential of PM<sub>2.5</sub>: the PIAMA birth cohort study, *Occup. Environ. Med.*, 73, 154–160, doi:10.1136/oemed-2015-103175, 2016.

Zielinski, H., Mudway, I. S., Bérubé, K. A., Murphy, S., Richards, R. and Kelly, F. J.: Modeling the interactions of particulates with epithelial lining fluid antioxidants, *Am. Physiol. Soc.*, (22), 719–726, 1999.
